# Supplementary material for: Pressure-induced structural transformations and new polymorphs in BiVO4
Source: Royal Society of Chemistry journal article supplement (doi:10.1039/d0cp01274b), 2020-01-01
Supplement: d0cp01274b1.pdf [file d0cp01274b1.pdf]

## Supporting Information

### Pressure-induced structural transformations and new polymorphs in BiVO<sub>4</sub>

Xuerui Cheng<sup>1</sup>, Jiwen Guan<sup>2</sup>, Liying Jiang<sup>3</sup>, Huanjun Zhang<sup>1</sup>, Pan Wang<sup>4</sup>, Adebayo O. Adeniyi<sup>5</sup>, Yansun Yao<sup>5</sup>, Lei Su<sup>6,\*</sup>, Yang Song<sup>4,\*</sup>

1. School of Physics and Electronic Engineering, Zhengzhou University of Light Industry, Zhengzhou, Henan, 450002, PR China

2. Department of Physics and Astronomy, University of Western Ontario, London, Ontario N6A 3K7, Canada

3. College of Electrical and Information Engineering, Zhengzhou University of Light Industry, Zhengzhou, Henan 450002, PR China

4. Department of Chemistry, University of Western Ontario, London, Ontario N6A 5B7, Canada.

5. Department of Physics and Engineering Physics, University of Saskatchewan, Saskatoon, Saskatchewan S7N 5E2, Canada

6. Center for High Pressure Science and Technology Advanced Research, 100094 Beijing, PR China

\*Corresponding authors:

Lei Su (e-mail: [leisu2050@iccas.ac.cn](mailto:leisu2050@iccas.ac.cn))

Yang Song (e-mail: [yang.song@uwo.ca](mailto:yang.song@uwo.ca))

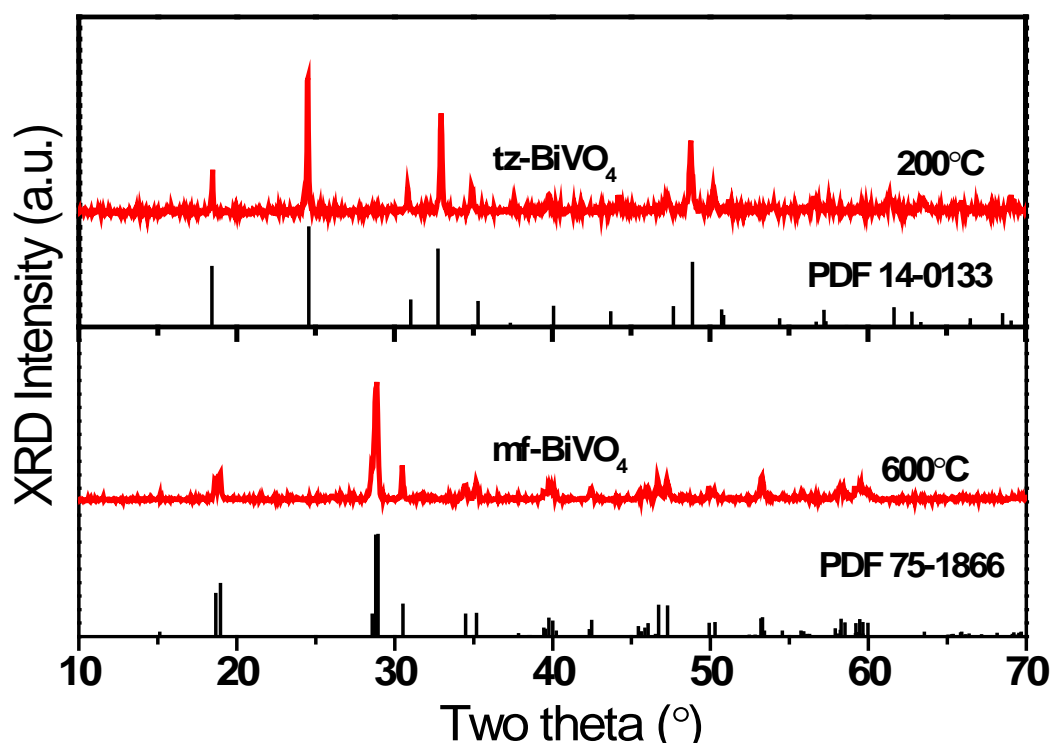

**Figure S1.** XRD patterns of fergusonite- and zircon-type  $\text{BiVO}_4$  synthesized using a hydrothermal method.

The crystal structure and phase purity of samples are characterized by XRD analysis, as shown in Figure S1. For the as-prepared sample formed under hydrothermal conditions at 200 °C, its diffraction peaks correspond to those of tetragonal zircon-type  $\text{BiVO}_4$  (PDF 14-0133). The fergusonite-type  $\text{BiVO}_4$  transforms to monoclinic fergusonite- $\text{BiVO}_4$  (PDF 75-1866) by heat treatment at 600 °C. The observation of no un-indexed reflections and high quality structural refinement results suggest the successful synthesis of high-purity  $\text{BiVO}_4$  in two distinctive known crystal structures.

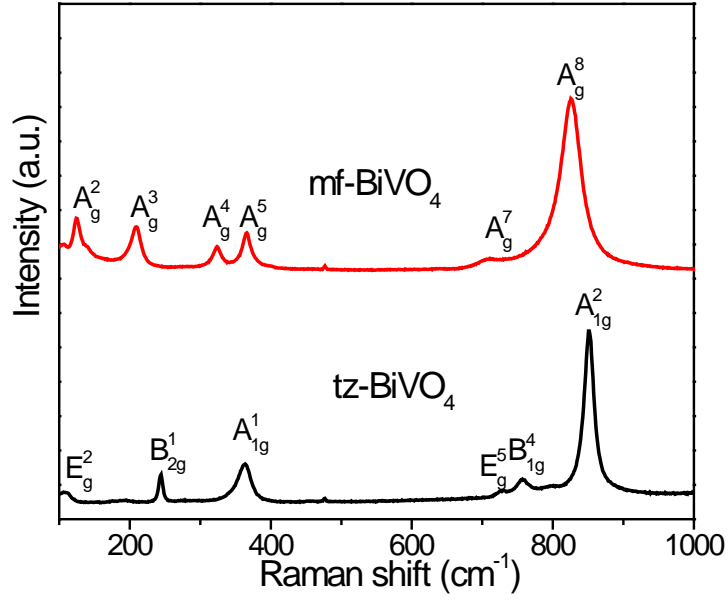

**Figure S2.** Raman patterns of fergusonite- and zircon-type  $\text{BiVO}_4$  obtained at ambient conditions.

According to the group theory analysis, there are 18 Raman active modes for mf- $\text{BiVO}_4$  represented as:  $8A_g + 10B_g$  and 12 Raman modes for tz- $\text{BiVO}_4$  as  $2A_{1g} + 4B_{1g} + B_{2g} + 5E_g$ . However, at ambient pressure, only 6 modes and 6 modes are clearly observed for mf- $\text{BiVO}_4$  and tz- $\text{BiVO}_4$ , as shown in Figure S2, because some polarized phonon modes and some weak Raman modes can not be discerned in our experiment. The Raman results have confirmed the successful synthesis of mf- and tz- $\text{BiVO}_4$  samples.

**Table S1.** Observed Raman modes for fergusonite- and zircon-type  $\text{BiVO}_4$  with assignments.

| mf- $\text{BiVO}_4$ |            |                          | tz- $\text{BiVO}_4$ |                            |                  |
|---------------------|------------|--------------------------|---------------------|----------------------------|------------------|
| Assignment          | $\omega_0$ | $\omega_0(\text{Ref18})$ | Assignment          | $\omega_0(\text{cm}^{-1})$ | $\omega_0^{[1]}$ |
| $A_g^2$             | 125        | 129                      | $E_g^2$             | 109                        | 112              |
| $A_g^3$             | 208        | 213                      | $B_{2g}^1$          | 244                        | 248              |
| $A_g^4$             | 324        | 327                      | $A_g^1$             | 363                        | 367              |
| $A_g^5$             | 366        | 369                      | $E_g^5$             | 728                        | 734              |
| $A_g^7$             | 705        | 708                      | $B_{1g}^4$          | 757                        | 763              |
| $A_g^8$             | 825        | 831                      | $A_g^2$             | 851                        | 857              |

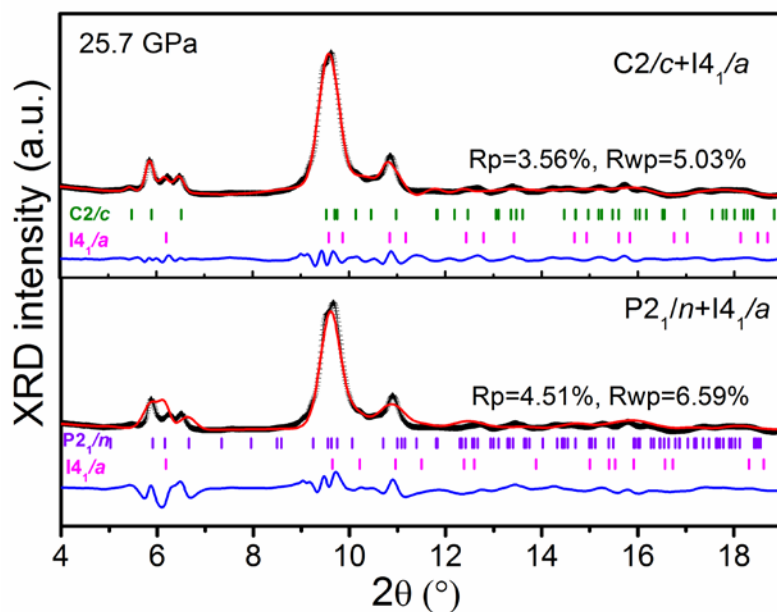

**Figure. S3.** Comparison of the Rietveld refinement of XRD pattern at 25.7 GPa using  $P2_1/n$  and  $C2/c$  structure models respectively. The experimental data are shown as black crosses with refinements shown as red solid lines and the difference between calculated and observed intensities is shown as blue lines. Ticks indicate the positions of Bragg peaks.

To confirm the structure of post-scheelite, we used both  $P2_1/n$  and  $C2/c$  ( $\beta$ -fergusonite) structural models to refine XRD pattern at 25.7 GPa. As can be seen, the  $C2/c$  modes fits the diffraction pattern very well. Moreover, the values of  $R_p$  and  $R_{wp}$  further suggest  $C2/c$  mode is more suitable.

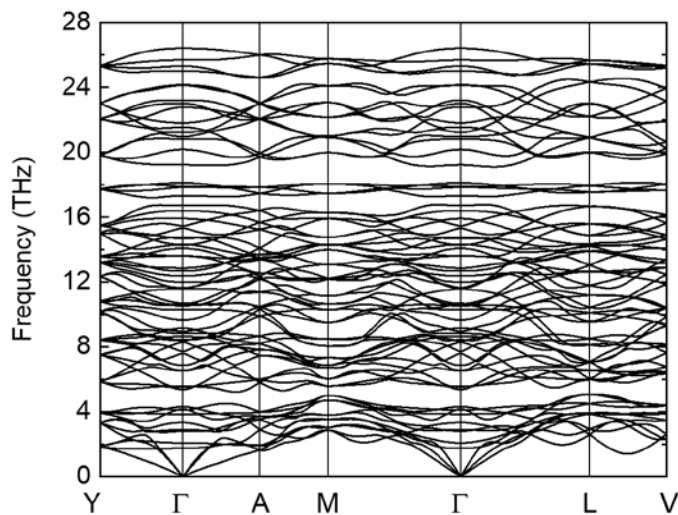

**Figure S4.** Calculated phonon dispersion relations for  $\beta$ -fergusonite structure at 30 GPa.

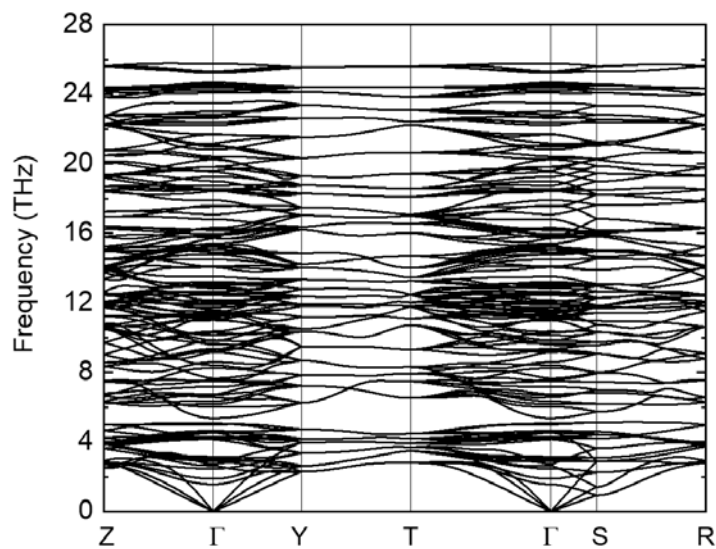

**Figure S5.** Calculated phonon dispersion relations for the  $Cmca$  structure at 40 GPa.

## Reference

[1] Pellicer-Porres, J.; Vazquez-Socorro, D.; Lopez-Moreno, S.; Munoz, A.; Rodriguez-Hernandez, P.; Martinez-Garcia, D.; Achary, S. N.; Rettie, A. J. E.; Mullins, C. B., Phase Transition Systematics in  $\text{BiVO}_4$  by Means of High-Pressure-High-Temperature Raman Experiments. *Phys Rev B* **2018**, 98, 214109.
